# Supplementary material
Source: HighWire-hosted journal article supplement (https://diabetes.diabetesjournals.org/content/suppl/2005/03/18/53.6.1496)
Supplement: Supplement.pdf [file Supplement.pdf]

Table 1S

| GenBank Accession Number | LocusLink ID | Name                                                                             | Symbol         | Gene Ontology code                                                                             | G>U Ratio | G>U 95% CI    | K>U Ratio | K>U 95% CI     | I>U Ratio | I>U 95% CI    |
|--------------------------|--------------|----------------------------------------------------------------------------------|----------------|------------------------------------------------------------------------------------------------|-----------|---------------|-----------|----------------|-----------|---------------|
| AA537033                 | 13653        | early growth response 1                                                          | Egr1           | GO:0003676; GO:0003677; GO:0006355; GO:0005634; GO:0045182                                     | 3,91      | [2,55 - 5,99] | 7,42      | [4,86 - 11,33] | 0,93      | [0,77 - 1,12] |
| AA958974                 | 15936        | immediate early response 2                                                       | Ier2           | GO:0005554; GO:0000004; GO:0005737                                                             | 2,92      | [2,57 - 3,33] | 7,89      | [6,82 - 9,13]  | 0,99      | [0,86 - 1,14] |
| BI790969                 | 15901        | inhibitor of DNA binding 1                                                       | Idb1           | GO:0003677; GO:0007275; GO:0000122; GO:0005634; GO:0045765                                     | 2,55      | [2,36 - 2,76] | 2,35      | [2,07 - 2,68]  | 0,98      | [0,88 - 1,09] |
| AA869400                 | 15936        | immediate early response 2                                                       | Ier2           | GO:0005554; GO:0000004; GO:0005737                                                             | 2,54      | [2,33 - 2,77] | 6,68      | [5,83 - 7,66]  | 0,94      | [0,84 - 1,05] |
| AI646026                 | 15937        | immediate early response 3                                                       | Ier3           | GO:0016021                                                                                     | 2,25      | [2,13 - 2,39] | 1,55      | [1,41 - 1,7]   | 0,90      | [0,84 - 0,96] |
| AA119154                 | 233895       | cDNA sequence BC006909                                                           | BC006909       |                                                                                                | 2,07      | [1,83 - 2,35] | 5,81      | [4,5 - 7,5]    | 0,95      | [0,88 - 1,02] |
| W10821                   |              |                                                                                  |                |                                                                                                | 1,84      | [1,52 - 2,23] | 3,77      | [3,07 - 4,62]  | 0,93      | [0,85 - 1,01] |
| BI319352                 | 74155        | RIKEN cDNA 1300002F13 gene                                                       | 1300002F13 Rik |                                                                                                | 1,69      | [1,5 - 1,9]   | 1,42      | [1,27 - 1,59]  | 1,09      | [0,96 - 1,24] |
| AA123373                 | 15902        | inhibitor of DNA binding 2                                                       | Idb2           | GO:0007515; GO:0007275; GO:0005634                                                             | 1,61      | [1,52 - 1,71] | 1,47      | [1,4 - 1,55]   | 1,28      | [1,23 - 1,32] |
| AA517679                 | 76266        | RIKEN cDNA 0610043A03 gene                                                       | 0610043A03 Rik |                                                                                                | 1,59      | [1,38 - 1,83] | 1,74      | [1,67 - 1,8]   | 1,79      | [1,54 - 2,08] |
| AI574282                 | 76983        | RIKEN cDNA 3110021P21 gene                                                       | 3110021P21 Rik |                                                                                                | 1,58      | [1,39 - 1,79] | 1,59      | [1,42 - 1,77]  | 1,66      | [1,46 - 1,88] |
| AI785720                 | 20384        | splicing factor, arginine/serine-rich 5 (SRp40, HRS)                             | Sfrs5          | GO:0003676; GO:0003723; GO:0006376; GO:0006371; GO:0006355; GO:0005681; GO:0005634             | 1,57      | [1,45 - 1,7]  | 1,48      | [1,41 - 1,54]  | 1,44      | [1,39 - 1,5]  |
| BI788712                 | 12338        | calpain 6                                                                        | Capn6          | GO:0004198; GO:0004197; GO:0006508; GO:0005622                                                 | 1,57      | [1,39 - 1,78] | 1,58      | [1,45 - 1,73]  | 1,73      | [1,59 - 1,87] |
| AA882421                 | 11702        | S-adenosylmethionine decarboxylase 1                                             | Amd1           | GO:0004014; GO:0006597; GO:0008295; GO:0016829; GO:0016831                                     | 1,55      | [1,45 - 1,66] | 1,48      | [1,36 - 1,61]  | 1,21      | [1,09 - 1,35] |
| BI319623                 | 67004        | Mus musculus adult male colon cDNA, RIKEN full-length enriched library, clone:90 |                |                                                                                                | 1,50      | [1,37 - 1,65] | 1,62      | [1,16 - 2,26]  | 1,64      | [1,2 - 2,23]  |
| BI966990                 | 57394        | kidney-specific membrane protein                                                 | Nx17-pending   | GO:0016021; GO:0005615                                                                         | 1,50      | [1,41 - 1,6]  | 1,50      | [1,4 - 1,6]    | 1,61      | [1,52 - 1,7]  |
| AA763015                 | 59048        | RIKEN cDNA 1500002I11 gene                                                       | 1500002I11R ik | GO:0016021; GO:0016740; GO:0016757                                                             | 1,48      | [1,3 - 1,69]  | 1,49      | [1,31 - 1,69]  | 1,54      | [1,38 - 1,73] |
| BI900192                 | 71701        | RIKEN cDNA 1200003F12 gene                                                       | 1200003F12 Rik | GO:0005975; GO:0005615; GO:0004553; GO:0016740; GO:0016779                                     | 1,48      | [1,41 - 1,55] | 1,78      | [1,64 - 1,93]  | 1,63      | [1,43 - 1,86] |
| AI255428                 | 15902        | inhibitor of DNA binding 2                                                       | Idb2           | GO:0007515; GO:0007275; GO:0005634                                                             | 1,47      | [1,31 - 1,66] | 1,11      | [0,87 - 1,4]   | 1,20      | [1,01 - 1,42] |
| AA522172                 | 66882        | basic leucine zipper and W2 domains 1                                            | Bzw1           | GO:0003743; GO:0005524; GO:0006446                                                             | 1,47      | [1,39 - 1,56] | 1,44      | [1,35 - 1,54]  | 1,46      | [1,36 - 1,57] |
| AI646970                 | 66142        | cytochrome c oxidase subunit VIIb                                                | Cox7b          | GO:0005739; GO:0016491                                                                         | 1,45      | [1,38 - 1,53] | 1,45      | [1,36 - 1,54]  | 1,58      | [1,53 - 1,64] |
| BG141716                 | 11723        | amylase 2, pancreatic                                                            | Amy2           | GO:0004556; GO:0005975; GO:0005615; GO:0016787; GO:0016798                                     | 1,44      | [1,26 - 1,65] | 1,45      | [1,24 - 1,71]  | 1,63      | [1,42 - 1,88] |
| AA274974                 | 67180        | RIKEN cDNA 2610311I19 gene                                                       | 2610311I19R ik | GO:0016021                                                                                     | 1,43      | [1,34 - 1,51] | 1,45      | [1,37 - 1,52]  | 1,35      | [1,27 - 1,43] |
| BG141813                 | 15936        | immediate early response 2                                                       | Ier2           | GO:0005554; GO:0000004; GO:0005737                                                             | 1,42      | [1,17 - 1,73] | 3,42      | [2,71 - 4,32]  | 0,94      | [0,78 - 1,14] |
| BI792554                 |              |                                                                                  |                |                                                                                                | 1,42      | [1,21 - 1,68] | 1,26      | [1,18 - 1,33]  | 1,22      | [1,01 - 1,48] |
| BI794624                 | 19177        | proteasome (prosome, macropain) subunit, beta type 7                             | Psmb7          | GO:0008233; GO:0006511; GO:0005829; GO:0005839; GO:0016787                                     | 1,41      | [1,28 - 1,56] | 1,40      | [1,19 - 1,66]  | 1,16      | [1,07 - 1,27] |
| AI327322                 | 13006        | chondroitin sulfate proteoglycan 6                                               | Cspg6          | GO:0005524; GO:0007126; GO:0007059; GO:0007049; GO:0007067; GO:0006281; GO:0005871; GO:0005634 | 1,41      | [1,18 - 1,68] | 1,62      | [1,36 - 1,93]  | 1,70      | [1,53 - 1,89] |
| BI441452                 | 66142        | cytochrome c oxidase subunit VIIb                                                | Cox7b          | GO:0005739; GO:0016491                                                                         | 1,41      | [1,35 - 1,46] | 1,41      | [1,37 - 1,44]  | 1,56      | [1,49 - 1,63] |
| BG797876                 | 53861        | zinc finger protein 265                                                          | Zfp265         | GO:0005524; GO:0005634                                                                         | 1,40      | [1,26 - 1,57] | 1,23      | [1,15 - 1,31]  | 1,63      | [1,51 - 1,77] |
| BG797897                 | 21402        | transcription elongation factor B (SIII), polypeptide 1-like                     | Tceb1l         | GO:0003746; GO:0005515; GO:0019005                                                             | 1,40      | [1,32 - 1,49] | 1,36      | [1,29 - 1,43]  | 1,51      | [1,44 - 1,58] |
| AA867229                 | 79264        | cerebral cavernous malformations 1                                               | Ccm1           | GO:0005083; GO:0005515                                                                         | 1,40      | [1,29 - 1,52] | 1,57      | [1,38 - 1,78]  | 1,21      | [0,84 - 1,75] |
| BI319581                 | 17184        | matrin 3                                                                         | Matr3          |                                                                                                | 1,39      | [1,27 - 1,53] | 1,60      | [1,38 - 1,85]  | 1,76      | [1,55 - 1,99] |
| BI963248                 | 73274        | RIKEN cDNA 1700034P14 gene                                                       | 1700034P14 Rik |                                                                                                | 1,39      | [1,27 - 1,53] | 1,51      | [1,46 - 1,56]  | 1,43      | [1,23 - 1,65] |
| AA275042                 | 53315        | N-sulfotransferase                                                               | Sultn          | GO:0004062; GO:0008146; GO:0000103; GO:0016740                                                 | 1,39      | [1,34 - 1,45] | 1,35      | [1,21 - 1,51]  | 1,37      | [1,27 - 1,48] |
| BI437713                 | 69144        | RIKEN cDNA 1810035L17 gene                                                       | 1810035L17 Rik |                                                                                                | 1,38      | [1,27 - 1,51] | 1,37      | [1,28 - 1,46]  | 1,49      | [1,37 - 1,63] |
| AI099189                 | 234358       | hypothetical protein LOC234358                                                   | LOC234358      |                                                                                                | 1,37      | [1,28 - 1,47] | 1,37      | [1,24 - 1,51]  | 1,49      | [1,37 - 1,62] |
| AI644134                 |              |                                                                                  |                |                                                                                                | 1,37      | [1,26 - 1,49] | 1,55      | [1,38 - 1,73]  | 1,52      | [1,34 - 1,72] |
| W08076                   | 66384        | signal recognition particle 19                                                   | Srp19          | GO:0008312; GO:0003723; GO:0006605; GO:0006613; GO:0005786; GO:0030529                         | 1,37      | [1,3 - 1,44]  | 1,36      | [1,27 - 1,47]  | 1,42      | [1,3 - 1,54]  |
| BI466176                 | 211378       | RIKEN cDNA 6720489N17 gene                                                       | 6720489N17 Rik | GO:0003676; GO:0006355; GO:0005622                                                             | 1,37      | [1,2 - 1,56]  | 1,32      | [1,25 - 1,4]   | 1,44      | [1,3 - 1,6]   |
| BI794667                 | 22057        | transducer of ErbB-2.1                                                           | Tob1           | GO:0003714; GO:0005515; GO:0007184; GO:0005737; GO:0030514; GO:0045668; GO:0046332             | 1,36      | [1,27 - 1,47] | 1,69      | [1,46 - 1,97]  | 1,09      | [1,03 - 1,15] |
| BI790762                 | 53861        | zinc finger protein 265                                                          | Zfp265         | GO:0005524; GO:0005634                                                                         | 1,36      | [1,22 - 1,52] | 1,37      | [1,2 - 1,56]   | 1,74      | [1,57 - 1,93] |

|          |                                                                        |                   |                                                                                                                        |                    |                    |                    |
|----------|------------------------------------------------------------------------|-------------------|------------------------------------------------------------------------------------------------------------------------|--------------------|--------------------|--------------------|
| BM022660 | 12417 chromobox homolog 3 (Drosophila HP1 gamma)                       | Cbx3              | GO:0003682; GO:0006333; GO:0006355; GO:0005634; GO:0016568; GO:0000785                                                 | 1,36 [1,25 - 1,48] | 1,45 [1,3 - 1,61]  | 1,54 [1,38 - 1,72] |
| AA267992 | 70273 RIKEN cDNA 2310051E17 gene                                       | 2310051E17<br>Rik |                                                                                                                        | 1,36 [1,2 - 1,54]  | 1,66 [1,44 - 1,9]  | 1,29 [1,12 - 1,49] |
| BI437804 |                                                                        |                   |                                                                                                                        | 1,36 [1,23 - 1,5]  | 0,95 [0,85 - 1,07] | 1,02 [0,87 - 1,19] |
| AA203882 | 68514 RIKEN cDNA 1110008L20 gene                                       | 1110008L20<br>Rik | GO:0005509                                                                                                             | 1,35 [1,2 - 1,53]  | 2,56 [2,19 - 3]    | 1,08 [0,99 - 1,17] |
| BI900177 | 72111 RIKEN cDNA 2010305F15 gene                                       | 2010305F15<br>Rik |                                                                                                                        | 1,35 [1,23 - 1,48] | 1,35 [1,24 - 1,47] | 1,43 [1,33 - 1,55] |
| BI440010 | 27362 DnaJ (Hsp40) homolog, subfamily B, member 9                      | Dnajb9            | GO:0003754; GO:0005615; GO:0005634                                                                                     | 1,35 [1,24 - 1,47] | 1,43 [1,22 - 1,69] | 1,30 [1,13 - 1,5]  |
| BG655381 | 109082 RIKEN cDNA 1110064L07 gene                                      | 1110064L07<br>Rik |                                                                                                                        | 1,35 [1,11 - 1,63] | 1,37 [1,09 - 1,73] | 1,33 [1,02 - 1,74] |
| AA154133 |                                                                        |                   |                                                                                                                        | 1,34 [1,29 - 1,4]  | 0,94 [0,88 - 1,01] | 1,07 [1,01 - 1,14] |
| AA616918 | 213895 hypothetical protein LOC213895                                  | LOC213895         |                                                                                                                        | 1,34 [1,15 - 1,57] | 1,32 [1,17 - 1,5]  | 1,17 [0,97 - 1,42] |
| BI964951 | 66118 RIKEN cDNA 1110005A23 gene                                       | 1110005A23<br>Rik | GO:0003677; GO:0006350; GO:0006445; GO:0006355; GO:0005634; GO:0006417                                                 | 1,34 [1,2 - 1,49]  | 1,44 [1,31 - 1,58] | 1,66 [1,47 - 1,87] |
| AA186117 | 101685 RIKEN cDNA 5830435K17 gene                                      | 5830435K17<br>Rik |                                                                                                                        | 1,34 [1,13 - 1,59] | 1,30 [1,09 - 1,54] | 1,10 [0,95 - 1,28] |
| BI901606 | 22438 inactive X specific transcripts                                  | Xist              | GO:0005694; GO:0009048; GO:0009048; GO:0005694                                                                         | 1,34 [1,29 - 1,39] | 1,06 [0,96 - 1,17] | 1,16 [1,09 - 1,23] |
| BI465567 | 14910 gene trap ROSA 26, Philippe Soriano                              | Gt(ROSA)26S<br>or |                                                                                                                        | 1,33 [1,26 - 1,41] | 1,21 [1,11 - 1,32] | 1,35 [1,26 - 1,45] |
| BG797808 | 16573 kinesin family member 5B                                         | Kif5b             | GO:0003777; GO:0005524; GO:0005515; GO:0003774; GO:0006839; GO:0005871; GO:0005875; GO:0007017; GO:0007078; GO:0016326 | 1,33 [1,22 - 1,45] | 1,58 [1,47 - 1,7]  | 1,44 [1,33 - 1,57] |
| AA839584 | 14579 GTP binding protein (gene overexpressed in skeletal muscle)      | Gem               | GO:0003925; GO:0005525; GO:0005524; GO:0007264; GO:0016020                                                             | 1,33 [1,18 - 1,49] | 2,97 [2,45 - 3,61] | 0,87 [0,8 - 0,95]  |
| AA833402 | 15937 immediate early response 3                                       | Ier3              | GO:0016021                                                                                                             | 1,33 [1,17 - 1,51] | 1,00 [0,83 - 1,21] | 0,78 [0,6 - 1,01]  |
| AA797722 |                                                                        |                   |                                                                                                                        | 1,33 [1,21 - 1,45] | 1,07 [0,87 - 1,32] | 1,08 [1 - 1,18]    |
| BI901240 | 17975 nucleolin                                                        | Ncl               | GO:0003676; GO:0003723; GO:0003677; GO:0005634                                                                         | 1,32 [1,24 - 1,42] | 1,46 [1,31 - 1,63] | 1,38 [1,31 - 1,46] |
| BI348746 | 97165 high mobility group box 2                                        | Hmgb2             | GO:0005524; GO:0003677; GO:0007001; GO:0006323; GO:0006355; GO:0005694; GO:0005634; GO:0000785                         | 1,32 [1,29 - 1,36] | 1,42 [1,25 - 1,61] | 1,46 [1,43 - 1,49] |
| AI042993 | 24067 signal recognition particle 54                                   | Srp54             | GO:0000166; GO:0005048; GO:0005525; GO:0005524; GO:0003723; GO:0006605; GO:0005786                                     | 1,32 [1,2 - 1,46]  | 1,34 [1,16 - 1,55] | 1,56 [1,38 - 1,77] |
| BI788602 |                                                                        |                   |                                                                                                                        | 1,32 [1,17 - 1,49] | 0,96 [0,91 - 1,01] | 1,06 [0,95 - 1,19] |
| AI115882 | 12607 CCAAT/enhancer binding protein alpha (C/EBP), related sequence 1 | Cebpa-rs1         | GO:0006355; GO:0005634; GO:0045182                                                                                     | 1,32 [1,26 - 1,39] | 1,27 [1,08 - 1,5]  | 1,21 [1,1 - 1,34]  |
| BI902046 | 14105 neural-salient serine/arginine-rich                              | Nsr               | GO:0003676                                                                                                             | 1,32 [1,21 - 1,45] | 1,41 [1,29 - 1,54] | 1,60 [1,49 - 1,72] |
| BG270509 |                                                                        |                   |                                                                                                                        | 1,32 [1,14 - 1,53] | 1,36 [1,27 - 1,46] | 1,45 [1,29 - 1,63] |
| BI902579 | 78941 RIKEN cDNA 9430068D06 gene                                       | 9430068D06<br>Rik |                                                                                                                        | 1,32 [1,2 - 1,45]  | 1,22 [1,02 - 1,46] | 1,20 [1,14 - 1,28] |
| AI528704 | 19877 Rho-associated coiled-coil forming kinase 1                      | Rock1             | GO:0004713; GO:0005524; GO:0004674; GO:0004672; GO:0006468; GO:0007242; GO:0007165; GO:0005622; GO:0016301; GO:0016740 | 1,32 [1,17 - 1,49] | 1,34 [1,14 - 1,58] | 1,57 [1,28 - 1,92] |
| AA213034 | 55942 RIKEN cDNA 1110032C13 gene                                       | 1110032C13<br>Rik |                                                                                                                        | 1,32 [1,21 - 1,44] | 1,30 [1,13 - 1,49] | 0,98 [0,87 - 1,11] |
| AI461998 | 20384 splicing factor, arginine/serine-rich 5 (SRp40, HRS)             | Sfrs5             | GO:0003676; GO:0003723; GO:0006376; GO:0006371; GO:0006355; GO:0005681; GO:0005634                                     | 1,32 [1,09 - 1,59] | 1,30 [1,11 - 1,51] | 1,31 [1,14 - 1,51] |
| AA545089 | 21402 transcription elongation factor B (SIII), polypeptide 1-like     | Tceb1l            | GO:0003746; GO:0005515; GO:0019005                                                                                     | 1,32 [1,13 - 1,54] | 1,09 [0,94 - 1,25] | 1,17 [0,93 - 1,47] |
| BG141932 | 68873 RIKEN cDNA 1190002A23 gene                                       | 1190002A23<br>Rik |                                                                                                                        | 1,32 [1,02 - 1,69] | 1,15 [0,92 - 1,44] | 1,26 [1,11 - 1,43] |
| BI790984 | 72465 zinc finger protein 131                                          | Zfp131            | GO:0005515; GO:0005489; GO:0006118                                                                                     | 1,31 [1,16 - 1,49] | 1,50 [1,32 - 1,71] | 1,47 [1,32 - 1,64] |
| AA050884 |                                                                        |                   |                                                                                                                        | 1,31 [1,23 - 1,41] | 0,90 [0,82 - 0,99] | 0,99 [0,93 - 1,05] |
| AA183309 |                                                                        |                   |                                                                                                                        | 1,31 [1,2 - 1,43]  | 0,93 [0,87 - 0,99] | 1,02 [0,95 - 1,09] |
| AA265213 |                                                                        |                   |                                                                                                                        | 1,31 [1,2 - 1,44]  | 1,26 [1,1 - 1,45]  | 1,39 [1,19 - 1,63] |
| BI965585 |                                                                        |                   |                                                                                                                        | 1,31 [1,19 - 1,44] | 1,28 [1,08 - 1,52] | 1,33 [1,18 - 1,5]  |
| AI788885 | 67163 RIKEN cDNA 2610204L23 gene                                       | 2610204L23<br>Rik | GO:0005615                                                                                                             | 1,31 [0,99 - 1,73] | 1,50 [1,21 - 1,86] | 1,48 [1,05 - 2,07] |
| AW107304 | 56258 heterogeneous nuclear ribonucleoprotein H2                       | Hnrph2            | GO:0003676; GO:0003723; GO:0005634                                                                                     | 1,31 [1,26 - 1,36] | 1,12 [0,89 - 1,42] | 1,39 [1,15 - 1,67] |
| BI465398 | 20384 splicing factor, arginine/serine-rich 5 (SRp40, HRS)             | Sfrs5             | GO:0003676; GO:0003723; GO:0006376; GO:0006371; GO:0006355; GO:0005681; GO:0005634                                     | 1,31 [1,13 - 1,52] | 1,10 [0,99 - 1,21] | 1,19 [1,03 - 1,38] |
| AI322439 | 66384 signal recognition particle 19                                   | Srp19             | GO:0008312; GO:0003723; GO:0006605; GO:0006613; GO:0005786; GO:0030529                                                 | 1,31 [1,23 - 1,4]  | 1,15 [1,08 - 1,23] | 1,27 [1,21 - 1,32] |
| AI608348 | 76539 RIKEN cDNA 2610015K05 gene                                       | 2610015K05<br>Rik |                                                                                                                        | 1,31 [1,21 - 1,41] | 1,47 [1,37 - 1,57] | 1,50 [1,38 - 1,63] |
| AI121534 | 66726 RIKEN cDNA 4921518A06 gene                                       | 4921518A06<br>Rik |                                                                                                                        | 1,31 [1,2 - 1,42]  | 1,35 [1,28 - 1,42] | 1,44 [1,32 - 1,57] |
| AA545139 | 52127 DNA segment, Chr 6, ERATO Doi 313, expressed                     | D6Erttd313e       |                                                                                                                        | 1,30 [1,17 - 1,46] | 1,07 [0,94 - 1,23] | 1,13 [0,98 - 1,3]  |
| AI607378 |                                                                        |                   |                                                                                                                        | 1,30 [1,19 - 1,43] | 1,31 [1,2 - 1,43]  | 1,36 [1,26 - 1,46] |

|          |                                                                                      |                |                                                                                                                        |                    |                    |                    |
|----------|--------------------------------------------------------------------------------------|----------------|------------------------------------------------------------------------------------------------------------------------|--------------------|--------------------|--------------------|
| AA163090 | 99480 expressed sequence AA408582                                                    | AA408582       |                                                                                                                        | 1,30 [1,22 - 1,39] | 1,55 [1,41 - 1,7]  | 1,45 [1,34 - 1,57] |
| BI793811 | 17876 myelin basic protein expression factor 2, repressor Myef2                      |                |                                                                                                                        | 1,30 [1,19 - 1,42] | 1,45 [1,36 - 1,55] | 1,56 [1,5 - 1,62]  |
| BI901804 |                                                                                      |                |                                                                                                                        | 1,30 [1,2 - 1,41]  | 1,06 [0,97 - 1,14] | 1,07 [0,99 - 1,15] |
| AI957263 | 54375 ornithine decarboxylase antizyme inhibitor                                     | Oazin          | GO:0003824; GO:0006596; GO:0006595                                                                                     | 1,30 [1,24 - 1,36] | 1,34 [1,25 - 1,44] | 1,22 [1,15 - 1,29] |
| AA435101 | 106869 RIKEN cDNA E130304C20 gene                                                    | E130304C20 Rik |                                                                                                                        | 1,30 [1,24 - 1,36] | 1,25 [1,18 - 1,32] | 1,36 [1,3 - 1,43]  |
| BI965072 | 69823 RIKEN cDNA 3830421F13 gene                                                     | 3830421F13 Rik |                                                                                                                        | 1,30 [1,16 - 1,45] | 1,46 [1,36 - 1,57] | 1,42 [1,26 - 1,61] |
| BI900227 | 22027 tumor rejection antigen gp96                                                   | Tra1           | GO:0005524; GO:0003754; GO:0005509; GO:0005783; GO:0005615                                                             | 1,30 [1,23 - 1,36] | 1,37 [1,18 - 1,58] | 1,32 [1,25 - 1,39] |
| AI642107 | 225055 F-box only protein 11                                                         | Fbxo11         |                                                                                                                        | 1,29 [1,13 - 1,48] | 1,35 [1,18 - 1,55] | 1,32 [1,21 - 1,45] |
| AA209098 | 19714 REV3-like, catalytic subunit of DNA polymerase zeta RAD54 like (S. cerevisiae) | Rev3l          | GO:0003894; GO:0000166; GO:0008408; GO:0003887; GO:0003677; GO:0006260; GO:0006281; GO:0005634; GO:0016740             | 1,29 [1,19 - 1,41] | 1,45 [1,35 - 1,56] | 1,52 [1,42 - 1,62] |
| BG797247 |                                                                                      |                |                                                                                                                        | 1,29 [1,19 - 1,41] | 1,28 [1,11 - 1,47] | 1,35 [1,17 - 1,55] |
| BI789693 | 219181 hypothetical protein 6330501D17                                               | 6330501D17     |                                                                                                                        | 1,29 [1,06 - 1,57] | 1,17 [0,99 - 1,39] | 1,35 [1,26 - 1,44] |
| BI465867 | 235956 hypothetical protein MGC18736                                                 | MGC18736       |                                                                                                                        | 1,29 [1,2 - 1,38]  | 1,29 [1,2 - 1,39]  | 1,50 [1,29 - 1,74] |
| BI900343 | 22027 tumor rejection antigen gp96                                                   | Tra1           | GO:0005524; GO:0003754; GO:0005509; GO:0005783; GO:0005615                                                             | 1,29 [1,23 - 1,35] | 1,44 [1,23 - 1,69] | 1,36 [1,26 - 1,46] |
| AA267095 | 71555 RIKEN cDNA 9030618F05 gene                                                     | 9030618F05 Rik |                                                                                                                        | 1,29 [1,16 - 1,42] | 1,24 [1,19 - 1,3]  | 1,33 [1,21 - 1,47] |
| AA986808 | 66882 basic leucine zipper and W2 domains 1                                          | Bzw1           | GO:0003743; GO:0005524; GO:0006446                                                                                     | 1,28 [1,15 - 1,43] | 1,22 [1,02 - 1,45] | 1,31 [1,16 - 1,49] |
| BM021722 | 12785 cellular nucleic acid binding protein                                          | Cnbp           | GO:0003676; GO:0003677; GO:0003700; GO:0008284; GO:0006695; GO:0006355; GO:0005829; GO:0005783; GO:0005634; GO:0045944 | 1,28 [1,2 - 1,38]  | 1,38 [1,2 - 1,58]  | 1,28 [1,17 - 1,4]  |
| AA880046 | 12151 B lymphoma Mo-MLV insertion region 1                                           | Bmi1           | GO:0005515; GO:0007420; GO:0008151; GO:0006959; GO:0006355; GO:0001501; GO:0005634; GO:0016568; GO:0016604             | 1,28 [1,15 - 1,43] | 1,32 [1,23 - 1,43] | 1,54 [1,42 - 1,66] |
| BG797677 | 102910 expressed sequence AI448196                                                   | AI448196       |                                                                                                                        | 1,28 [1,14 - 1,44] | 1,40 [1,24 - 1,57] | 1,32 [1,15 - 1,5]  |
| BI320110 | 233726 RIKEN cDNA A330055O14 gene                                                    | A330055O14 Rik | GO:0006606; GO:0042393                                                                                                 | 1,28 [1,04 - 1,58] | 1,37 [1,27 - 1,48] | 1,46 [1,35 - 1,57] |
| BG141824 | 11308 spectrin SH3 domain binding protein 1                                          | Ssh3bp1        | GO:0008151                                                                                                             | 1,28 [1,11 - 1,48] | 2,06 [1,53 - 2,78] | 1,26 [0,94 - 1,69] |
| BI319578 | 13207 DEAD/H (Asp-Glu-Ala-Asp/His) box polypeptide 5                                 | Ddx5           | GO:0003676; GO:0004386; GO:0005524; GO:0003724; GO:0003723; GO:0005622; GO:0005634; GO:0008026; GO:0016787             | 1,28 [1,19 - 1,37] | 1,49 [1,35 - 1,64] | 1,29 [1,22 - 1,36] |
| BI465889 | 27981 DNA segment, Chr 4, Wayne State University 53, expressed                       | D4Wsu53e       |                                                                                                                        | 1,28 [1,16 - 1,4]  | 1,53 [1,31 - 1,79] | 1,77 [1,65 - 1,89] |
| BI790703 | 66142 cytochrome c oxidase subunit VIIb                                              | Cox7b          | GO:0005739; GO:0016491                                                                                                 | 1,28 [1,24 - 1,31] | 1,33 [1,26 - 1,4]  | 1,41 [1,35 - 1,48] |
| W34543   | 24067 signal recognition particle 54                                                 | Srp54          | GO:0000166; GO:0005048; GO:0005525; GO:0005524; GO:0003723; GO:0006605; GO:0005786                                     | 1,28 [1,17 - 1,39] | 1,42 [1,35 - 1,5]  | 1,52 [1,41 - 1,64] |
| W30596   | 108767 Proline rich 2                                                                | Prol2          |                                                                                                                        | 1,16 [1 - 1,34]    | 2,84 [2,28 - 3,53] | 0,89 [0,77 - 1,05] |
| AI644221 |                                                                                      |                |                                                                                                                        | 1,27 [1,2 - 1,36]  | 1,33 [1,24 - 1,43] | 1,39 [1,3 - 1,49]  |
| BG797444 |                                                                                      |                |                                                                                                                        | 1,27 [1,14 - 1,42] | 1,32 [1,19 - 1,46] | 1,15 [1,03 - 1,29] |
| AA048984 | 72096 RIKEN cDNA 2010208K18 gene                                                     | 2010208K18 Rik |                                                                                                                        | 1,27 [1,2 - 1,35]  | 1,32 [1,23 - 1,41] | 1,42 [1,31 - 1,53] |
| AA119664 | 106205 RIKEN cDNA A430104C18 gene                                                    | A430104C18 Rik |                                                                                                                        | 1,27 [1,11 - 1,45] | 1,62 [1,35 - 1,94] | 1,41 [1,24 - 1,6]  |
| BI440443 | 216820 similar to DKFZ566O084 protein                                                | LOC216820      |                                                                                                                        | 1,27 [1,19 - 1,35] | 1,39 [1,18 - 1,64] | 1,32 [1,2 - 1,45]  |
| BI903082 | 12339 calpain 7                                                                      | Capn7          | GO:0004198; GO:0006508; GO:0005622; GO:0016787                                                                         | 1,27 [1,05 - 1,52] | 1,46 [1,24 - 1,72] | 1,58 [1,31 - 1,91] |
| BG270525 | 21425583[ BG270525 ngi]                                                              |                |                                                                                                                        | 1,26 [0,91 - 1,75] | 1,52 [1,37 - 1,7]  | 1,41 [1,3 - 1,52]  |
| BI437607 |                                                                                      |                |                                                                                                                        | 1,26 [1,1 - 1,45]  | 1,36 [1,07 - 1,73] | 1,37 [1,18 - 1,6]  |
| BM021665 | 97165 high mobility group box 2                                                      | Hmgb2          | GO:0005524; GO:0003677; GO:0007001; GO:0006323; GO:0006355; GO:0005694; GO:0005634; GO:0000785                         | 1,26 [1,22 - 1,31] | 1,36 [1,32 - 1,4]  | 1,42 [1,37 - 1,47] |
| AI647038 | 79555 RIKEN cDNA 8030460C05 gene                                                     | 8030460C05 Rik |                                                                                                                        | 1,26 [1,16 - 1,37] | 1,28 [1,23 - 1,33] | 1,33 [1,28 - 1,4]  |
| BI793630 | 67684 RIKEN cDNA 3300001P08 gene                                                     | 3300001P08 Rik | GO:0006950; GO:0006915                                                                                                 | 1,26 [1,09 - 1,46] | 1,32 [1,15 - 1,52] | 1,59 [1,42 - 1,79] |
| BI319417 | 16600 Kruppel-like factor 4 (gut)                                                    | Klf4           | GO:0003676; GO:0003677; GO:0006355; GO:0005634; GO:0045182                                                             | 1,28 [0,99 - 1,65] | 2,01 [1,47 - 2,76] | 0,86 [0,58 - 1,26] |
| BI499781 | 67726 RIKEN cDNA 9030624B09 gene                                                     | 9030624B09 Rik |                                                                                                                        | 1,26 [0,98 - 1,62] | 1,37 [1,17 - 1,61] | 1,22 [1,01 - 1,47] |
| BI466390 |                                                                                      |                |                                                                                                                        | 1,26 [1,15 - 1,38] | 1,36 [1,25 - 1,46] | 1,29 [1,19 - 1,41] |
| W91003   | 14030 Ewing sarcoma homolog                                                          | Ewsh           | GO:0003676; GO:0005516; GO:0003723; GO:0003677; GO:0006355; GO:0005634                                                 | 1,26 [1,17 - 1,35] | 1,27 [1,2 - 1,35]  | 1,38 [1,28 - 1,49] |
| AA190021 | 229279 hypothetical protein MGC37309                                                 | MGC37309       |                                                                                                                        | 1,26 [1,21 - 1,31] | 1,35 [1,25 - 1,45] | 1,31 [1,2 - 1,42]  |
| AA144106 | 67153 RIKEN cDNA 2610207P08 gene                                                     | 2610207P08 Rik |                                                                                                                        | 1,26 [1,15 - 1,37] | 1,26 [1,18 - 1,35] | 1,31 [1,2 - 1,43]  |
| BG797659 | 13990 enhancer trap locus 1                                                          | Etl1           | GO:0003676; GO:0004386; GO:0005524; GO:0003677; GO:0005634; GO:0008026; GO:0016787                                     | 1,25 [1,06 - 1,48] | 1,34 [1,19 - 1,51] | 1,46 [1,33 - 1,6]  |

|          |                                                                    |                |                                                                                                                                    |                    |                    |                    |
|----------|--------------------------------------------------------------------|----------------|------------------------------------------------------------------------------------------------------------------------------------|--------------------|--------------------|--------------------|
| BI465396 | 11502 a disintegrin and metalloproteinase domain 9 (meltrin gamma) | Adam9          | GO:0005524; GO:0004222; GO:0006508; GO:0016021; GO:0005615                                                                         | 1,25 [1,11 - 1,4]  | 1,29 [1,11 - 1,51] | 1,32 [1,15 - 1,52] |
| AA545600 | 18221 nuclear distribution gene C homolog (Aspergillus)            | Nudc           | GO:0005554; GO:0000004; GO:0008372                                                                                                 | 1,25 [1,13 - 1,38] | 1,28 [1,15 - 1,42] | 1,40 [1,29 - 1,52] |
| AI256413 | 18148 nucleophosmin 1                                              | Npm1           | GO:0003676; GO:0005515; GO:0003723; GO:0005730; GO:0005634                                                                         | 1,25 [1,18 - 1,32] | 1,38 [1,29 - 1,48] | 1,54 [1,49 - 1,6]  |
| AI255366 | 98221 DNA segment, Mouse Genome Informatics 1                      | D1Mgi1         |                                                                                                                                    | 1,24 [1,18 - 1,32] | 1,31 [1,2 - 1,43]  | 1,42 [1,32 - 1,53] |
| AA591062 | 81489 DnaJ (Hsp40) homolog, subfamily B, member 1                  | Dnajb1         | GO:0003773; GO:0003754                                                                                                             | 0,94 [0,91 - 0,98] | 1,90 [1,72 - 2,1]  | 0,84 [0,75 - 0,96] |
| BI791071 | 73112 RIKEN cDNA 3110003A17 gene                                   | 3110003A17 Rik |                                                                                                                                    | 1,24 [1,04 - 1,48] | 1,15 [0,95 - 1,4]  | 1,35 [1,11 - 1,64] |
| AA118976 | 13207 DEAD/H (Asp-Glu-Ala-Asp/His) box polypeptide 5               | Ddx5           | GO:0003676; GO:0004386; GO:0005524; GO:0003724; GO:0003723; GO:0005622; GO:0005634; GO:0008026; GO:0016787                         | 1,24 [1,18 - 1,31] | 1,30 [1,17 - 1,45] | 1,35 [1,3 - 1,39]  |
| AA839307 | 18000 septin 2                                                     | sep-02         | GO:0005525; GO:0005524                                                                                                             | 1,24 [1,15 - 1,33] | 1,44 [1,32 - 1,56] | 1,41 [1,29 - 1,55] |
| AA386534 | 140740 SEC63 (S. cerevisiae)                                       | Sec63          | GO:0008565; GO:0003754; GO:0015031; GO:0006886; GO:0005792; GO:0005783; GO:0016021; GO:0005634                                     | 1,24 [1,18 - 1,3]  | 1,33 [1,17 - 1,5]  | 1,25 [1,1 - 1,42]  |
| AI325979 | 69981 RIKEN cDNA 2010200I23 gene                                   | 2010200I23Rik  |                                                                                                                                    | 1,24 [1,19 - 1,29] | 1,35 [1,29 - 1,41] | 1,48 [1,43 - 1,54] |
| BI900353 | 30795 FK506 binding protein 3                                      | Fkbp3          | GO:0003755; GO:0006457; GO:0005634; GO:0016853                                                                                     | 1,24 [1,11 - 1,38] | 1,29 [1,17 - 1,41] | 1,31 [1,21 - 1,43] |
| AI461709 | 70273 RIKEN cDNA 2310051E17 gene                                   | 2310051E17 Rik |                                                                                                                                    | 1,24 [1,17 - 1,31] | 1,44 [1,36 - 1,52] | 1,29 [1,21 - 1,37] |
| AW146366 | 76469 RIKEN cDNA 2310076E16 gene                                   | 2310076E16 Rik |                                                                                                                                    | 1,24 [1,11 - 1,37] | 1,43 [1,32 - 1,55] | 1,27 [1,17 - 1,37] |
| AA987183 | 17184 matrin 3                                                     | Matr3          |                                                                                                                                    | 1,24 [0,98 - 1,56] | 1,27 [0,98 - 1,66] | 1,63 [1,25 - 2,14] |
| AA690695 | 215351 SUMO-1-specific protease                                    | Susp1-pending  | GO:0008233                                                                                                                         | 1,23 [1,15 - 1,32] | 1,57 [1,46 - 1,68] | 1,55 [1,45 - 1,67] |
| AA790394 | 69583 tumor necrosis factor (ligand) superfamily, member 13        | Tnfrsf13       | GO:0005164; GO:0005125; GO:0008284; GO:0006955; GO:0016020; GO:0008372                                                             | 1,23 [1,12 - 1,36] | 1,24 [1,14 - 1,36] | 1,33 [1,21 - 1,47] |
| AI267071 | 69921 RIKEN cDNA 2610510D13 gene                                   | 2610510D13 Rik |                                                                                                                                    | 1,23 [1,13 - 1,33] | 1,31 [1,22 - 1,41] | 1,31 [1,19 - 1,44] |
| BI348882 |                                                                    |                |                                                                                                                                    | 1,22 [1,12 - 1,34] | 1,34 [1,24 - 1,44] | 1,23 [1,1 - 1,39]  |
| BI677375 |                                                                    |                |                                                                                                                                    | 1,22 [1,06 - 1,42] | 1,32 [1,18 - 1,49] | 1,27 [1,12 - 1,43] |
| BG797857 | 110809 splicing factor, arginine/serine-rich 1 (ASF/SF2)           | Sfrs1          | GO:0003676; GO:0008248; GO:0003723; GO:0006376; GO:0006605; GO:0006397; GO:0006371; GO:0005681; GO:0005634                         | 1,22 [1,16 - 1,29] | 1,18 [1,11 - 1,26] | 1,38 [1,31 - 1,45] |
| AA939997 | 11789 adenomatosis polyposis coli                                  | Apc            | GO:0008013; GO:0004601; GO:0005524; GO:0008151; GO:0005871; GO:0005737; GO:0005634; GO:0009798; GO:0009952; GO:0009953; GO:0016055 | 1,22 [1,12 - 1,33] | 1,22 [1,14 - 1,3]  | 1,33 [1,24 - 1,42] |
| AI005988 | 56758 muscleblind-like (Drosophila)                                | Mbnl           | GO:0003676; GO:0003723; GO:0005634                                                                                                 | 1,22 [1,07 - 1,39] | 1,32 [1,23 - 1,42] | 1,33 [1,22 - 1,45] |
| AI463154 | LOC24156 LOC241560                                                 |                |                                                                                                                                    | 1,12 [1 - 1,26]    | 1,51 [1,31 - 1,73] | 0,90 [0,8 - 1,02]  |
| AA172657 | 53861 zinc finger protein 265                                      | Zfp265         | GO:0005524; GO:0005634                                                                                                             | 1,22 [1,16 - 1,28] | 1,38 [1,26 - 1,52] | 1,46 [1,37 - 1,55] |
| BI793773 | 218513 RIKEN cDNA G630013P12 gene                                  | G630013P12 Rik |                                                                                                                                    | 1,22 [1,03 - 1,44] | 1,43 [1,34 - 1,54] | 1,34 [1,1 - 1,63]  |
| BI902268 | 76701 RIKEN cDNA 1810044E12 gene                                   | 1810044E12 Rik |                                                                                                                                    | 1,12 [1,02 - 1,22] | 1,46 [1,21 - 1,76] | 1,10 [0,9 - 1,33]  |
| AI461851 | 21872 tight junction protein 1                                     | Tjp1           | GO:0005515; GO:0007242; GO:0005923; GO:0016020; GO:0005886; GO:0005912                                                             | 1,22 [1,13 - 1,31] | 1,42 [1,32 - 1,53] | 1,40 [1,31 - 1,5]  |
| AI528350 | 94175 expressed sequence AW413091                                  | AW413091       | GO:0004869; GO:0005615                                                                                                             | 1,21 [1,07 - 1,38] | 1,11 [0,98 - 1,25] | 1,37 [1,24 - 1,51] |
| AA638509 | 80795 selenoprotein K                                              | Selk-pending   | GO:0016021                                                                                                                         | 1,26 [1,2 - 1,33]  | 1,46 [1,37 - 1,54] | 1,19 [1,14 - 1,25] |
| BI793769 | 22129 tetratricopeptide repeat domain                              | Ttc3           |                                                                                                                                    | 1,21 [1,09 - 1,35] | 1,26 [1,21 - 1,31] | 1,34 [1,23 - 1,46] |
| AA545518 | 18983 CCR4-NOT transcription complex, subunit 7                    | Cnot7          | GO:0005515; GO:0006355; GO:0005634; GO:0016563; GO:0030014; GO:0045944                                                             | 1,21 [1,03 - 1,44] | 1,21 [0,88 - 1,66] | 1,30 [1,07 - 1,58] |
| BG141752 | 230908 TAR DNA binding protein                                     | Tardbp         | GO:0003676; GO:0003723; GO:0003677; GO:0006355; GO:0005634                                                                         | 1,21 [1,07 - 1,38] | 1,31 [1,22 - 1,4]  | 1,29 [1,24 - 1,35] |
| BI793746 | 70632 RIKEN cDNA 5730507C01 gene                                   | 5730507C01 Rik |                                                                                                                                    | 1,21 [1,12 - 1,31] | 1,33 [1,24 - 1,43] | 1,49 [1,36 - 1,65] |
| BG655387 | 230257 ROD1 regulator of differentiation 1 (S. pombe)              | Rod1           | GO:0003676; GO:0003676                                                                                                             | 1,21 [1,11 - 1,33] | 1,39 [1,13 - 1,71] | 1,39 [1,23 - 1,57] |
| BI319591 | 56426 programmed cell death 10                                     | Pdcd10         |                                                                                                                                    | 1,21 [1,07 - 1,37] | 1,32 [1,25 - 1,4]  | 1,33 [1,24 - 1,43] |
| AA543303 | 70738 RIKEN cDNA 6330417L24 gene                                   | 6330417L24 Rik |                                                                                                                                    | 1,21 [1,05 - 1,4]  | 1,41 [1,17 - 1,7]  | 1,31 [1,11 - 1,55] |
| BG270517 | 18983 CCR4-NOT transcription complex, subunit 7                    | Cnot7          | GO:0005515; GO:0006355; GO:0005634; GO:0016563; GO:0030014; GO:0045944                                                             | 1,21 [1,02 - 1,43] | 1,35 [1,19 - 1,53] | 1,22 [1,05 - 1,42] |
| BI499145 | 74585 presenilin-like protein 4                                    | 4833416I09Rik  |                                                                                                                                    | 1,21 [1,1 - 1,33]  | 1,34 [1,21 - 1,49] | 1,47 [1,36 - 1,59] |
| BI794747 | 68184 density-regulated protein                                    | Denr           | GO:0003743; GO:0008151; GO:0006413                                                                                                 | 1,21 [1,15 - 1,27] | 1,22 [1,16 - 1,29] | 1,31 [1,22 - 1,4]  |
| BI903301 | 52615 DNA segment, Chr 11, ERATO Doi 530, expressed                | D11ErtD530e    |                                                                                                                                    | 1,21 [1,07 - 1,36] | 1,44 [1,3 - 1,59]  | 1,50 [1,25 - 1,8]  |
| BI965531 | 67636 RIKEN cDNA 4930469P12 gene                                   | 4930469P12 Rik |                                                                                                                                    | 1,20 [1,12 - 1,3]  | 1,34 [1,17 - 1,53] | 1,38 [1,27 - 1,49] |
| AA511059 | 66625 RIKEN cDNA 5730406M06 gene                                   | 5730406M06 Rik |                                                                                                                                    | 1,20 [1,08 - 1,34] | 1,19 [1,09 - 1,31] | 1,37 [1,23 - 1,52] |
| BI319675 | 22218 ubiquitin-like 1                                             | Ubl1           | GO:0004840; GO:0005554; GO:0006281; GO:0000004; GO:0005643; GO:0005634; GO:0008372                                                 | 1,20 [1,05 - 1,37] | 1,22 [1,08 - 1,39] | 1,38 [1,25 - 1,52] |

|          |                                                                      |                |                                                                                                                                                |                    |                    |                    |
|----------|----------------------------------------------------------------------|----------------|------------------------------------------------------------------------------------------------------------------------------------------------|--------------------|--------------------|--------------------|
| BI901587 | 13837 Eph receptor A3                                                | Epha3          | GO:0005003; GO:0004713; GO:0005524; GO:0004674; GO:0004872; GO:0004672; GO:0007169; GO:0006468; GO:0016020; GO:0016021; GO:0005615; GO:0016740 | 1,20 [1,09 - 1,32] | 1,34 [1,25 - 1,44] | 1,29 [1,23 - 1,35] |
| AA537107 | 216864 macrophage galactose N-acetyl-galactosamine specific lectin 2 | Mgl2-pending   |                                                                                                                                                | 1,19 [1,05 - 1,36] | 1,28 [1,1 - 1,49]  | 1,32 [1,15 - 1,53] |
| AA003149 | 230908 TAR DNA binding protein                                       | Tardbp         | GO:0003676; GO:0003723; GO:0003677; GO:0006355; GO:0005634                                                                                     | 1,19 [1,09 - 1,3]  | 1,25 [1,14 - 1,38] | 1,35 [1,22 - 1,49] |
| AA386889 | 17756 microtubule-associated protein 2                               | Mtap2          | GO:0005519; GO:0005516; GO:0005875; GO:0001578; GO:0007017; GO:0016358                                                                         | 1,19 [1,13 - 1,25] | 1,27 [1,22 - 1,33] | 1,36 [1,29 - 1,43] |
| BG141486 | 17263 maternally expressed gene 3                                    | Meg3           |                                                                                                                                                | 1,19 [1,07 - 1,32] | 1,35 [1,14 - 1,6]  | 1,33 [1,26 - 1,41] |
| AW146178 | 80795 selenoprotein K                                                | Selk-pending   | GO:0016021                                                                                                                                     | 1,21 [1,15 - 1,28] | 1,41 [1,36 - 1,47] | 1,17 [1,08 - 1,28] |
| AA277912 | 13368 DNA fragmentation factor, beta subunit                         | Dffb           | GO:0004518; GO:0006915; GO:0005622; GO:0005634; GO:0016329; GO:0016787                                                                         | 1,24 [1,18 - 1,32] | 1,38 [1,26 - 1,5]  | 1,01 [0,9 - 1,13]  |
| AI256109 | 13094 cytochrome P450, family 2, subfamily b, polypeptide 9          | Cyp2b9         | GO:0004497; GO:0006118; GO:0016020; GO:0005792; GO:0005783; GO:0016491                                                                         | 1,19 [0,75 - 1,87] | 1,36 [1,01 - 1,84] | 1,33 [1,2 - 1,46]  |
| AI527914 | 170791 RNA-binding region (RNP1, RRM) containing 2                   | Rnpc2          | GO:0003676; GO:0005515; GO:0003723; GO:0003713; GO:0006350; GO:0006397; GO:0006371; GO:0006355; GO:0005634; GO:0045182                         | 1,18 [1,07 - 1,3]  | 1,30 [1,17 - 1,44] | 1,44 [1,3 - 1,58]  |
| AI255532 | 67204 eukaryotic translation initiation factor 2, subunit 2 (beta)   | Eif2s2         | GO:0003743; GO:0005489; GO:0006118; GO:0006412; GO:0006413                                                                                     | 1,18 [1,09 - 1,28] | 1,23 [1,11 - 1,37] | 1,36 [1,24 - 1,48] |
| AI255219 | 52705 HIV-1 Rev binding protein 2                                    | Hrb2           | GO:0003676                                                                                                                                     | 1,18 [1,08 - 1,29] | 1,23 [1,09 - 1,39] | 1,37 [1,23 - 1,53] |
| AA237184 | 13207 DEAD/H (Asp-Glu-Ala-Asp/His) box polypeptide 5                 | Ddx5           | GO:0003676; GO:0004386; GO:0005524; GO:0003724; GO:0003723; GO:0005622; GO:0005634; GO:0008026; GO:0016787                                     | 1,18 [1,07 - 1,29] | 1,36 [1,14 - 1,63] | 1,27 [1,11 - 1,45] |
| AI314059 | 235072 septin 7                                                      | sep-07         | GO:0005525; GO:0016288; GO:0005871                                                                                                             | 1,18 [1,03 - 1,35] | 1,32 [1,12 - 1,56] | 1,35 [1,24 - 1,47] |
| BG141782 | 71437 RIKEN cDNA 5630401D06 gene                                     | 5630401D06 Rik |                                                                                                                                                | 1,17 [1,04 - 1,33] | 1,33 [1,15 - 1,55] | 1,32 [1,23 - 1,42] |
| AI315990 | 18148 nucleophosmin 1                                                | Npm1           | GO:0003676; GO:0005515; GO:0003723; GO:0005730; GO:0005634                                                                                     | 1,17 [1,06 - 1,3]  | 1,25 [1,15 - 1,36] | 1,31 [1,16 - 1,49] |
| BI440613 | 54616 exostoses (multiple)-like 3                                    | Extl3          | GO:0008151; GO:0016020; GO:0005783; GO:0016021; GO:0016740; GO:0016757                                                                         | 1,17 [0,95 - 1,45] | 1,23 [1,09 - 1,38] | 1,43 [1,28 - 1,6]  |
| AA396113 | 17688 mutS homolog 6 (E. coli)                                       | Msh6           | GO:0003684; GO:0005524; GO:0003677; GO:0006298; GO:0006281                                                                                     | 1,17 [0,94 - 1,46] | 1,30 [1,1 - 1,54]  | 1,26 [1,06 - 1,48] |
| BI962450 | 74149 RIKEN cDNA 1300003B13 gene                                     | 1300003B13 Rik |                                                                                                                                                | 1,17 [1,09 - 1,26] | 1,23 [1,09 - 1,4]  | 1,36 [1,23 - 1,5]  |
| BI790534 |                                                                      |                |                                                                                                                                                | 1,16 [1 - 1,35]    | 1,36 [1,22 - 1,51] | 1,34 [1,17 - 1,54] |
| AA870423 | 56376 enigma homolog (R. norvegicus)                                 | Enh-pending    | GO:0005515; GO:0000004; GO:0030018                                                                                                             | 1,16 [0,96 - 1,41] | 1,14 [1,05 - 1,25] | 1,47 [1,33 - 1,64] |
| AI788302 |                                                                      |                |                                                                                                                                                | 1,16 [1,03 - 1,3]  | 1,34 [1,29 - 1,39] | 1,48 [1,42 - 1,53] |
| BI901716 | 97961 expressed sequence C78541                                      | C78541         |                                                                                                                                                | 1,22 [1,15 - 1,29] | 1,37 [1,22 - 1,53] | 1,26 [1,2 - 1,32]  |
| BI320175 |                                                                      |                |                                                                                                                                                | 1,03 [0,93 - 1,13] | 1,35 [1,05 - 1,72] | 1,01 [0,79 - 1,3]  |
| AI174007 |                                                                      |                |                                                                                                                                                | 1,16 [1,1 - 1,22]  | 1,34 [1,18 - 1,52] | 1,22 [1,11 - 1,35] |
| AI875473 |                                                                      |                |                                                                                                                                                | 1,15 [1,02 - 1,3]  | 1,14 [1,01 - 1,27] | 1,30 [1,17 - 1,46] |
| BI465455 |                                                                      |                |                                                                                                                                                | 1,22 [1,13 - 1,32] | 1,34 [1,27 - 1,41] | 1,13 [1 - 1,28]    |
| BI790351 | 102334 ankyrin repeat domain 10                                      | Ankrd10        | GO:0003677; GO:0003700; GO:0006355                                                                                                             | 1,15 [1,04 - 1,27] | 1,39 [1,23 - 1,56] | 1,38 [1,26 - 1,51] |
| BG797668 |                                                                      |                |                                                                                                                                                | 1,15 [1,11 - 1,19] | 1,26 [1,21 - 1,32] | 1,32 [1,24 - 1,4]  |
| AA517526 |                                                                      |                |                                                                                                                                                | 1,15 [1,05 - 1,26] | 1,16 [0,96 - 1,4]  | 1,32 [1,15 - 1,51] |
| AI158428 | 71900 RIKEN cDNA 2310036D22 gene                                     | 2310036D22 Rik |                                                                                                                                                | 1,15 [1,09 - 1,2]  | 1,28 [1,17 - 1,4]  | 1,39 [1,28 - 1,51] |
| AI098873 | 16709 kinectin 1                                                     | Ktn1           | GO:0007018; GO:0005783; GO:0016021; GO:0019894                                                                                                 | 1,15 [0,95 - 1,39] | 1,19 [0,95 - 1,49] | 1,30 [1,11 - 1,53] |
| AA675027 | 76244 RIKEN cDNA 6530403D07 gene                                     | 6530403D07 Rik |                                                                                                                                                | 1,14 [0,89 - 1,46] | 1,30 [0,96 - 1,78] | 1,33 [1,04 - 1,7]  |
| BI794072 |                                                                      |                |                                                                                                                                                | 1,14 [1,09 - 1,19] | 1,30 [1,18 - 1,42] | 1,34 [1,24 - 1,44] |
| AI326488 | 21872 tight junction protein 1                                       | Tjp1           | GO:0005515; GO:0007242; GO:0005923; GO:0016020; GO:0005886; GO:0005912                                                                         | 1,14 [1,06 - 1,22] | 1,34 [1,29 - 1,4]  | 1,35 [1,26 - 1,45] |
| AA759780 | 26427 old astrocyte specifically induced substance                   | Oasis-pending  | GO:0003677; GO:0003700; GO:0006355; GO:0005634                                                                                                 | 1,14 [1 - 1,29]    | 1,39 [1,1 - 1,76]  | 1,35 [1,08 - 1,69] |
| BI466309 | 22200 ubiquitin-activating enzyme E1C                                | Ube1c          | GO:0000074; GO:0000278; GO:0007113; GO:0019781                                                                                                 | 1,14 [1 - 1,29]    | 1,08 [0,9 - 1,3]   | 1,30 [1,05 - 1,62] |
| BI319854 | 21969 topoisomerase (DNA) I                                          | Top1           | GO:0003917; GO:0003916; GO:0003677; GO:0006265; GO:0006268; GO:0016853                                                                         | 1,13 [1,08 - 1,19] | 1,31 [1,1 - 1,57]  | 1,25 [1,09 - 1,44] |
| AI508643 |                                                                      |                |                                                                                                                                                | 1,13 [0,88 - 1,46] | 1,13 [0,98 - 1,29] | 1,36 [1,21 - 1,52] |
| BI901145 | 67040 RIKEN cDNA 2610007K22 gene                                     | 2610007K22 Rik |                                                                                                                                                | 1,15 [0,89 - 1,49] | 1,33 [1,07 - 1,65] | 1,01 [0,77 - 1,32] |
| BI788478 | 20658 Son cell proliferation protein                                 | Son            | GO:0003725; GO:0003676; GO:0005515; GO:0003723; GO:0003677; GO:0005622; GO:0005634                                                             | 1,12 [1,03 - 1,23] | 1,19 [1,11 - 1,27] | 1,30 [1,17 - 1,45] |
| BG797412 | 13018 CCCTC-binding factor                                           | Ctcf           | GO:0005489; GO:0003677; GO:0006306; GO:0006349; GO:0008151; GO:0006118; GO:0006355; GO:0005634; GO:0045182                                     | 1,19 [1,11 - 1,26] | 1,33 [1,28 - 1,37] | 1,24 [1,14 - 1,34] |
| BI792473 | 67273 NADH dehydrogenase (ubiquinone) 1 alpha subcomplex 10          | Ndufa10        | GO:0005615                                                                                                                                     | 1,12 [1,06 - 1,18] | 0,91 [0,85 - 0,97] | 1,47 [1,38 - 1,57] |
| BI499029 |                                                                      |                |                                                                                                                                                | 1,19 [1,13 - 1,25] | 1,31 [1,25 - 1,38] | 1,21 [1,15 - 1,27] |

|          |                                                                   |                |                                                                                                                                                |                    |                    |                    |
|----------|-------------------------------------------------------------------|----------------|------------------------------------------------------------------------------------------------------------------------------------------------|--------------------|--------------------|--------------------|
| AI526603 | 18949 pinin                                                       | Pnn            |                                                                                                                                                | 1,12 [1,05 - 1,19] | 1,30 [1,12 - 1,51] | 1,39 [1,21 - 1,59] |
| BG142495 | 20639 U2 small nuclear ribonucleoprotein B                        | Snrpb2         | GO:0008248; GO:0003723; GO:0006397; GO:0006371; GO:0005686; GO:0005681; GO:0005634; GO:0030529; GO:0019013                                     | 1,12 [0,99 - 1,26] | 1,23 [1,06 - 1,43] | 1,40 [1,16 - 1,7]  |
| BI498986 | 54139 interferon regulatory factor 6                              | Irf6           | GO:0003677; GO:0003700; GO:0006355; GO:0005634                                                                                                 | 1,13 [0,96 - 1,32] | 1,31 [1,1 - 1,57]  | 1,15 [1,01 - 1,31] |
| AA175194 |                                                                   |                |                                                                                                                                                | 1,11 [0,98 - 1,25] | 1,29 [1,18 - 1,41] | 1,32 [1,11 - 1,59] |
| BI348816 | 170791 RNA-binding region (RNP1, RRM) containing 2                | Rnpc2          | GO:0003676; GO:0005515; GO:0003723; GO:0003713; GO:0006350; GO:0006397; GO:0006371; GO:0006355; GO:0005634; GO:0045187                         | 1,10 [1,06 - 1,15] | 1,25 [1,15 - 1,36] | 1,42 [1,3 - 1,55]  |
| AA914458 | 227940 RIKEN cDNA 5830435C13 gene                                 | 5830435C13 Rik | GO:0003677                                                                                                                                     | 1,10 [0,91 - 1,34] | 1,01 [0,81 - 1,26] | 1,31 [1,04 - 1,64] |
| AI647074 | 77292 RIKEN cDNA 9430072K23 gene                                  | 9430072K23 Rik |                                                                                                                                                | 1,10 [0,96 - 1,25] | 3,45 [2,94 - 4,04] | 1,53 [1,33 - 1,76] |
| AA198396 | 109189 RIKEN cDNA 6720476A01 gene                                 | 6720476A01 Rik |                                                                                                                                                | 1,09 [1 - 1,19]    | 1,41 [1,24 - 1,6]  | 1,47 [1,41 - 1,54] |
| AI447294 | 106205 RIKEN cDNA A430104C18 gene                                 | A430104C18 Rik |                                                                                                                                                | 1,09 [1,03 - 1,15] | 1,20 [1,09 - 1,31] | 1,34 [1,29 - 1,38] |
| BI439940 | 56070 transcription elongation regulator 1 (CA150)                | Tcerg1         | GO:0003700; GO:0006350; GO:0016363                                                                                                             | 1,12 [0,98 - 1,28] | 1,31 [1,13 - 1,52] | 1,19 [1,14 - 1,24] |
| BI791070 | 13386 delta-like 1 homolog (Drosophila)                           | Dlk1           | GO:0005198; GO:0005509; GO:0016021; GO:0005615                                                                                                 | 1,08 [0,95 - 1,22] | 1,17 [0,97 - 1,42] | 1,33 [1,11 - 1,58] |
| BG797893 | 234023 hypothetical protein C130008N12                            | C130008N12     |                                                                                                                                                | 1,07 [0,91 - 1,24] | 1,07 [0,92 - 1,24] | 1,45 [1,36 - 1,54] |
| BG797926 |                                                                   |                |                                                                                                                                                | 1,06 [1,01 - 1,12] | 0,86 [0,71 - 1,03] | 0,73 [0,55 - 0,97] |
| BI794191 |                                                                   |                |                                                                                                                                                | 1,08 [0,98 - 1,2]  | 1,30 [1,09 - 1,56] | 1,09 [0,92 - 1,3]  |
| BI465529 |                                                                   |                |                                                                                                                                                | 1,02 [0,78 - 1,32] | 0,87 [0,8 - 0,94]  | 0,76 [0,6 - 0,97]  |
| AI156894 | 64602 iron responsive element binding protein 2                   | Ireb2          | GO:0006879; GO:0006445; GO:0008152; GO:0005737; GO:0016836; GO:0030350; GO:0030371                                                             | 1,15 [0,89 - 1,49] | 1,30 [1 - 1,69]    | 1,21 [1,12 - 1,31] |
| BG270936 |                                                                   |                |                                                                                                                                                | 0,95 [0,74 - 1,23] | 0,95 [0,74 - 1,23] | 0,76 [0,65 - 0,89] |
| AI115238 | 319322 splicing factor 3b, subunit 2                              | Sf3b2          | GO:0004497; GO:0006118; GO:0005792; GO:0016021; GO:0004499; GO:0016491                                                                         | 0,85 [0,78 - 0,93] | 0,77 [0,63 - 0,94] | 0,85 [0,76 - 0,96] |
| AI747734 | 11652 thymoma viral proto-oncogene 2                              | Akt2           | GO:0005524; GO:0004674; GO:0004672; GO:0008151; GO:0006468; GO:0000074; GO:0005622; GO:0016740                                                 | 0,92 [0,82 - 1,02] | 0,71 [0,51 - 0,99] | 0,76 [0,64 - 0,91] |
| BI319351 |                                                                   |                |                                                                                                                                                | 0,91 [0,77 - 1,09] | 0,95 [0,82 - 1,09] | 0,77 [0,66 - 0,88] |
| AA655490 | 19045 protein phosphatase 1, catalytic subunit, alpha isoform     | Ppp1ca         | GO:0004722; GO:0000163; GO:0015071; GO:0008598; GO:0000158; GO:0008151; GO:0005977; GO:0008152; GO:0006470; GO:0005654; GO:0005737; GO:0006417 | 0,86 [0,78 - 0,95] | 0,76 [0,66 - 0,88] | 0,81 [0,75 - 0,89] |
| BI788468 | 107702 ribonuclease/angiogenin inhibitor 1                        | Rnh1           |                                                                                                                                                | 0,90 [0,78 - 1,04] | 0,76 [0,63 - 0,92] | 0,86 [0,69 - 1,07] |
| W83009   | 103963 ribophorin I                                               | Rpn1           | GO:0004579; GO:0005783; GO:0016021; GO:0005615; GO:0016740                                                                                     | 0,85 [0,74 - 0,98] | 0,76 [0,63 - 0,92] | 0,84 [0,72 - 0,97] |
| BI900052 |                                                                   |                |                                                                                                                                                | 0,88 [0,79 - 0,98] | 0,76 [0,61 - 0,95] | 0,87 [0,73 - 1,04] |
| AI530357 | 12039 branched chain ketoacid dehydrogenase E1, alpha polypeptide | Bckdha         | GO:0003863; GO:0008152; GO:0005739; GO:0005615; GO:0016491; GO:0016624                                                                         | 0,91 [0,79 - 1,03] | 0,76 [0,61 - 0,94] | 0,90 [0,76 - 1,07] |
| BI499098 |                                                                   |                |                                                                                                                                                | 0,88 [0,61 - 1,25] | 0,85 [0,62 - 1,16] | 0,75 [0,58 - 0,97] |
| BI677171 | 17276 melanoma antigen                                            | Mela           | GO:0016021; GO:0003964; GO:0016740                                                                                                             | 0,87 [0,73 - 1,04] | 0,86 [0,7 - 1,05]  | 0,74 [0,65 - 0,86] |
| BI899979 | 11461 actin, beta, cytoplasmic                                    | Actb           | GO:0005198; GO:0005200; GO:0007010; GO:0005856                                                                                                 | 0,87 [0,76 - 1]    | 0,91 [0,74 - 1,11] | 0,75 [0,64 - 0,88] |
| BI966390 | 19216 prostaglandin E receptor 1 (subtype EP1)                    | Ptger1         | GO:0004957; GO:0004930; GO:0007186; GO:0016021; GO:0001584; GO:0004955                                                                         | 0,87 [0,66 - 1,13] | 0,79 [0,65 - 0,96] | 0,75 [0,69 - 0,8]  |
| AA036087 | 12575 cyclin-dependent kinase inhibitor 1A (P21)                  | Cdkn1a         | GO:0004861; GO:0007050; GO:0007049; GO:0005634; GO:0016301                                                                                     | 0,86 [0,73 - 1,03] | 0,85 [0,69 - 1,04] | 0,75 [0,64 - 0,88] |
| BG797471 | 22388 WD repeat domain 1                                          | Wdr1           | GO:0003779; GO:0007605; GO:0005856; GO:0015629                                                                                                 | 0,86 [0,72 - 1,03] | 0,76 [0,59 - 0,98] | 0,80 [0,62 - 1,03] |
| BI440639 | 228875 ovarian cancer overexpressed 1                             | Ovcov1         | GO:0005554; GO:0000004; GO:0016021; GO:0008372                                                                                                 | 0,85 [0,8 - 0,91]  | 0,76 [0,61 - 0,94] | 0,82 [0,77 - 0,88] |
| AI255344 | 66168 RIKEN cDNA 1110025J15 gene                                  | 1110025J15R ik | GO:0016021                                                                                                                                     | 0,86 [0,73 - 1]    | 0,76 [0,58 - 0,99] | 0,85 [0,71 - 1,02] |
| BI793781 | 66589 ubiquitin-conjugating enzyme E2 variant 1                   | Ube2v1         | GO:0005515; GO:0016874                                                                                                                         | 0,88 [0,81 - 0,96] | 0,75 [0,57 - 1]    | 0,88 [0,71 - 1,1]  |
| BI465540 | 66867 high mobility group 20A                                     | Hmg20a         | GO:0003677; GO:0006355                                                                                                                         | 0,84 [0,66 - 1,07] | 0,75 [0,59 - 0,96] | 0,84 [0,65 - 1,08] |
| BI788489 | 17025 aminolevulinate, delta-, dehydratase                        | Alad           | GO:0004655; GO:0006783; GO:0006779; GO:0016829                                                                                                 | 0,84 [0,77 - 0,92] | 0,75 [0,68 - 0,83] | 0,82 [0,73 - 0,92] |
| AA419767 | 17898 myosin light chain, regulatory A                            | Mylc2a         | GO:0005509; GO:0007010; GO:0005856                                                                                                             | 0,85 [0,69 - 1,06] | 0,80 [0,69 - 0,93] | 0,73 [0,61 - 0,89] |
| BG797712 | 107508 glutamyl-prolyl-tRNA synthetase                            | Eprs           | GO:0005524; GO:0006418; GO:0004812                                                                                                             | 0,97 [0,91 - 1,03] | 0,75 [0,59 - 0,95] | 0,94 [0,81 - 1,09] |
| W77711   | 14470 Rab acceptor 1 (prenylated)                                 | Rbac1          | GO:0005525; GO:0005515; GO:0005794; GO:0016021                                                                                                 | 0,84 [0,76 - 0,94] | 0,75 [0,64 - 0,87] | 0,83 [0,75 - 0,92] |
| BI319372 |                                                                   |                |                                                                                                                                                | 0,85 [0,7 - 1,04]  | 0,75 [0,68 - 0,82] | 0,92 [0,84 - 1,01] |
| AI987781 | 51897 DNA segment, Chr 2, ERATO Doi 391, expressed                | D2Ert4391e     |                                                                                                                                                | 0,86 [0,74 - 0,99] | 0,74 [0,57 - 0,98] | 0,84 [0,64 - 1,11] |
| BI319960 | 106529 glycoprotein, synaptic 2                                   | Gpsn2          | GO:0016021                                                                                                                                     | 0,84 [0,81 - 0,88] | 0,74 [0,57 - 0,96] | 0,86 [0,76 - 0,97] |
| AA869428 | 20226 seryl-aminoacyl-tRNA synthetase 1                           | Sars1          | GO:0004828; GO:0005524; GO:0006418; GO:0006412; GO:0004812; GO:0006434; GO:0016874                                                             | 0,85 [0,76 - 0,94] | 0,77 [0,66 - 0,9]  | 0,80 [0,73 - 0,88] |

|          |                                                                                        |                |                                                                                                                                                                                                |                    |                    |                    |
|----------|----------------------------------------------------------------------------------------|----------------|------------------------------------------------------------------------------------------------------------------------------------------------------------------------------------------------|--------------------|--------------------|--------------------|
| AI121290 | 22388 WD repeat domain 1                                                               | Wdr1           | GO:0003779; GO:0007605; GO:0005856; GO:0015629                                                                                                                                                 | 0,85 [0,68 - 1,06] | 0,73 [0,54 - 0,98] | 0,81 [0,67 - 0,96] |
| BI499090 | 72047 RNA helicase-related protein                                                     | Rnahp-pending  | GO:0003676; GO:0004386; GO:0005524; GO:0008026                                                                                                                                                 | 0,85 [0,77 - 0,93] | 0,71 [0,58 - 0,86] | 0,80 [0,68 - 0,95] |
| BI962179 | 67422 RIKEN cDNA 3222401G21 gene                                                       | 3222401G21 Rik | GO:0008152; GO:0016740                                                                                                                                                                         | 0,83 [0,69 - 1,01] | 0,74 [0,59 - 0,93] | 0,83 [0,67 - 1,02] |
| BI793791 |                                                                                        |                |                                                                                                                                                                                                | 0,84 [0,76 - 0,94] | 0,73 [0,71 - 0,75] | 0,78 [0,74 - 0,81] |
| BI348616 | 67373 RIKEN cDNA 2210010C04 gene                                                       | 2210010C04 Rik | GO:0004295; GO:0004252; GO:0008233; GO:0006508; GO:0007586; GO:0005615; GO:0004263; GO:0016787                                                                                                 | 0,84 [0,71 - 0,99] | 0,84 [0,69 - 1,02] | 0,74 [0,58 - 0,94] |
| BG797321 | 22375 tryptophanyl-tRNA synthetase                                                     | Wars           | GO:0005524; GO:0004830; GO:0006436; GO:0006418; GO:0006412; GO:0004812; GO:0016874                                                                                                             | 0,85 [0,76 - 0,95] | 0,74 [0,66 - 0,82] | 0,87 [0,77 - 0,98] |
| BI899995 | 11461 actin, beta, cytoplasmic                                                         | Actb           | GO:0005198; GO:0005200; GO:0007010; GO:0005856                                                                                                                                                 | 0,84 [0,78 - 0,9]  | 0,87 [0,71 - 1,07] | 0,72 [0,64 - 0,83] |
| W17702   | LOC21078 LOC210788                                                                     |                |                                                                                                                                                                                                | 0,84 [0,8 - 0,88]  | 0,75 [0,68 - 0,81] | 0,79 [0,74 - 0,84] |
| BI899918 | 11947 ATP synthase, H+ transporting mitochondrial F1 complex, beta subunit             | Atp5b          | GO:0005224; GO:0000166; GO:0005524; GO:0015078; GO:0015986; GO:0015992; GO:0006810; GO:0006811; GO:0005739; GO:0016071; GO:0006754; GO:0016469; GO:0006974; GO:0006289; GO:0006281; GO:0005634 | 0,91 [0,81 - 1,01] | 0,73 [0,64 - 0,85] | 0,83 [0,75 - 0,93] |
| BG797962 | 19358 RAD23a homolog (S. cerevisiae)                                                   | Rad23a         | GO:0006974; GO:0006289; GO:0006281; GO:0005634                                                                                                                                                 | 0,83 [0,76 - 0,9]  | 0,72 [0,56 - 0,93] | 0,85 [0,7 - 1,04]  |
| W97427   | 66940 scotin gene                                                                      | Scotin-pending | GO:0008632; GO:0006917; GO:0005635; GO:0005783; GO:0016021; GO:0016506                                                                                                                         | 0,84 [0,7 - 0,99]  | 0,76 [0,6 - 0,98]  | 0,83 [0,7 - 0,99]  |
| AA003101 | 64934 pescadillo homolog 1, containing BRCT domain (zebrafish)                         | Pes1           | GO:0005554; GO:0000089; GO:0007046; GO:0005730; GO:0005871; GO:0005622; GO:0005634; GO:0007000; GO:0000793                                                                                     | 0,86 [0,75 - 0,98] | 0,70 [0,55 - 0,9]  | 0,86 [0,71 - 1,04] |
| BI965468 | 51792 protein phosphatase 2 (formerly 2A), regulatory subunit A (PR 65), alpha isoform | Ppp2r1a        |                                                                                                                                                                                                | 0,83 [0,77 - 0,9]  | 0,71 [0,56 - 0,91] | 0,77 [0,66 - 0,91] |
| BG797301 | 56495 arsA (bacterial) arsenite transporter, ATP-binding, homolog 1                    | Asna1          | GO:0005524; GO:0006820; GO:0016020; GO:0016787; GO:0046685                                                                                                                                     | 0,83 [0,76 - 0,91] | 0,81 [0,67 - 0,97] | 0,76 [0,66 - 0,86] |
| AA036251 | 110196 farnesyl diphosphate synthetase                                                 | Fdps           | GO:0016740                                                                                                                                                                                     | 0,83 [0,7 - 0,99]  | 0,73 [0,58 - 0,91] | 0,87 [0,72 - 1,05] |
| AA036459 |                                                                                        |                |                                                                                                                                                                                                | 0,67 [0,36 - 1,26] | 0,67 [0,53 - 0,85] | 0,81 [0,61 - 1,06] |
| BI465440 | 14828 heat shock 70kD protein 5 (glucose-regulated protein)                            | Hspa5          | GO:0005524; GO:0003773; GO:0005783                                                                                                                                                             | 0,83 [0,76 - 0,9]  | 0,70 [0,56 - 0,88] | 0,76 [0,65 - 0,9]  |
| BI465916 |                                                                                        |                |                                                                                                                                                                                                | 0,82 [0,74 - 0,91] | 0,74 [0,63 - 0,88] | 0,79 [0,65 - 0,95] |
| BG797697 | 13033 cathepsin D                                                                      | Ctsd           | GO:0004190; GO:0004192; GO:0004194; GO:0008233; GO:0006508; GO:0005764; GO:0005615; GO:0016787                                                                                                 | 0,82 [0,74 - 0,91] | 0,68 [0,51 - 0,9]  | 0,77 [0,61 - 0,97] |
| AA986480 |                                                                                        |                |                                                                                                                                                                                                | 0,82 [0,68 - 0,99] | 0,75 [0,58 - 0,97] | 0,82 [0,66 - 1,02] |
| BI788460 | 71436 RIKEN cDNA 5530600M07 gene                                                       | 5530600M07 Rik |                                                                                                                                                                                                | 0,82 [0,76 - 0,87] | 0,73 [0,64 - 0,82] | 0,81 [0,7 - 0,94]  |
| BM022062 | 11429 aconitase 2, mitochondrial                                                       | Aco2           | GO:0003994; GO:0005506; GO:0006101; GO:0006099; GO:0008152; GO:0005739; GO:0016829; GO:0016836                                                                                                 | 0,81 [0,75 - 0,89] | 0,70 [0,55 - 0,89] | 0,83 [0,7 - 0,98]  |
| BI789522 | 17151 cyclin D-type binding-protein 1                                                  | Ccndbp1        | GO:0005515; GO:0005634                                                                                                                                                                         | 0,81 [0,71 - 0,94] | 0,74 [0,61 - 0,9]  | 0,85 [0,66 - 1,09] |
| AA108848 | 171508 cysteine-rich with EGF-like domains 1                                           | Creld1         |                                                                                                                                                                                                | 0,81 [0,69 - 0,96] | 0,70 [0,59 - 0,83] | 0,80 [0,69 - 0,94] |
| BI788668 | 27053 asparagine synthetase                                                            | Asns           | GO:0008152; GO:0004066; GO:0006529; GO:0006541; GO:0016874                                                                                                                                     | 0,81 [0,71 - 0,91] | 0,69 [0,54 - 0,87] | 0,82 [0,66 - 1,01] |
| AI196000 | 23871 E26 avian leukemia oncogene 1, 5' domain                                         | Ets1           | GO:0003677; GO:0003700; GO:0008151; GO:0006355; GO:0000074; GO:0005634                                                                                                                         | 0,80 [0,76 - 0,85] | 0,86 [0,76 - 0,97] | 0,76 [0,74 - 0,79] |
| AA049736 | 76524 DNA segment, Chr 9, Brigham & Women's Genetics 1455 expressed                    | D9Bwg1455e     |                                                                                                                                                                                                | 0,80 [0,7 - 0,92]  | 0,77 [0,68 - 0,86] | 0,82 [0,71 - 0,95] |
| AI195225 | 269523 valosin containing protein                                                      | Vcp            | GO:0000166; GO:0005524; GO:0005515; GO:0006810; GO:0008151; GO:0005794; GO:0005783; GO:0016787                                                                                                 | 0,80 [0,66 - 0,96] | 0,63 [0,4 - 0,99]  | 0,78 [0,56 - 1,07] |
| BI900715 | 70231 golgi reassembly stacking protein 2                                              | Gorasp2        | GO:0005554; GO:0000004; GO:0008372                                                                                                                                                             | 0,80 [0,68 - 0,94] | 0,67 [0,47 - 0,97] | 0,81 [0,63 - 1,04] |
| BI790439 | 16319 inner centromere protein                                                         | Incenp         | GO:0007049; GO:0007067; GO:0005871; GO:0005634; GO:0007017                                                                                                                                     | 0,80 [0,64 - 0,99] | 0,74 [0,56 - 0,96] | 0,80 [0,61 - 1,04] |
| BI900074 | 110854 protein phosphatase 2A, regulatory subunit B (PR 53)                            | Ppp2r4         |                                                                                                                                                                                                | 0,80 [0,69 - 0,92] | 0,68 [0,52 - 0,88] | 0,81 [0,65 - 1]    |
| BG797308 | 11773 adaptor protein complex AP-2, mu1                                                | Ap2m1          | GO:0006899; GO:0006886; GO:0016192; GO:0005905; GO:0030125; GO:0030133; GO:0030141                                                                                                             | 0,80 [0,7 - 0,91]  | 0,73 [0,59 - 0,92] | 0,80 [0,67 - 0,96] |
| BI466271 | 93721 carboxypeptidase N, polypeptide 1                                                | Cpn1           | GO:0004180                                                                                                                                                                                     | 0,80 [0,71 - 0,89] | 0,74 [0,61 - 0,89] | 0,80 [0,65 - 0,97] |
| BI441055 | 69077 proteasome (prosome, macropain) 26S subunit, non-ATPase, 11                      | Psm11          |                                                                                                                                                                                                | 0,80 [0,66 - 0,96] | 0,68 [0,53 - 0,88] | 0,80 [0,72 - 0,89] |
| AW106791 | 20505 solute carrier family 34 (sodium phosphate), member 1                            | Slc34a1        | GO:0015321; GO:0005386; GO:0006817; GO:0006814; GO:0006810; GO:0016020; GO:0016021; GO:0005887; GO:0015293                                                                                     | 0,79 [0,68 - 0,93] | 0,90 [0,66 - 1,21] | 0,64 [0,54 - 0,77] |
| AA123978 | 226422 hypothetical protein MGC28972                                                   | MGC28972       |                                                                                                                                                                                                | 0,79 [0,57 - 1,1]  | 0,73 [0,59 - 0,89] | 0,79 [0,64 - 0,98] |
| AW107158 | 20322 sorbitol dehydrogenase 1                                                         | Sdh1           | GO:0004024; GO:0008270; GO:0003939; GO:0016491                                                                                                                                                 | 0,79 [0,69 - 0,9]  | 0,66 [0,55 - 0,81] | 0,76 [0,68 - 0,85] |
| W98655   | 60595 actinin alpha 4                                                                  | Actn4          | GO:0003779; GO:0005509                                                                                                                                                                         | 0,78 [0,66 - 0,93] | 0,62 [0,39 - 0,99] | 0,77 [0,58 - 1,04] |
| BI793662 | 18458 poly A binding protein, cytoplasmic 1                                            | Pabpc1         | GO:0003676; GO:0003723                                                                                                                                                                         | 0,78 [0,68 - 0,88] | 0,67 [0,47 - 0,96] | 0,83 [0,66 - 1,05] |
| BG797335 | 20014 ribophorin II                                                                    | Rpn2           | GO:0005554; GO:0000004; GO:0008372                                                                                                                                                             | 0,78 [0,69 - 0,87] | 0,66 [0,49 - 0,89] | 0,78 [0,64 - 0,95] |
| AI115962 | 54401 tyrosine 3-monooxygenase/tryptophan 5-monooxygenase activation protein, beta pol | Ywhab          | GO:0005554; GO:0000004; GO:0008372; GO:0019904                                                                                                                                                 | 0,77 [0,69 - 0,86] | 0,76 [0,6 - 0,96]  | 0,89 [0,76 - 1,03] |
| AI891573 | 20226 seryl-aminoacyl-tRNA synthetase 1                                                | Sars1          | GO:0004828; GO:0005524; GO:0006418; GO:0006412; GO:0004812; GO:0006434; GO:0016874                                                                                                             | 0,77 [0,66 - 0,89] | 0,68 [0,45 - 1,04] | 0,75 [0,56 - 0,99] |
| W18121   | 14962 histocompatibility 2, complement component factor B                              | H2-Bf          | GO:0004295; GO:0004252; GO:0003811; GO:0006508; GO:0008283; GO:0005615; GO:0003812; GO:0004263; GO:0006957; GO:0016787                                                                         | 0,77 [0,46 - 1,27] | 0,98 [0,71 - 1,37] | 0,66 [0,48 - 0,91] |

|          |                                                                                     |                    |                                                                                                                                                                                                |                    |                    |                    |
|----------|-------------------------------------------------------------------------------------|--------------------|------------------------------------------------------------------------------------------------------------------------------------------------------------------------------------------------|--------------------|--------------------|--------------------|
| BI793660 | 107271 tyrosyl-tRNA synthetase                                                      | Yars               | GO:0004831; GO:0005153; GO:0000049; GO:0005524; GO:0004871; GO:0006437; GO:0006418; GO:0006412; GO:0006915; GO:0006928; GO:0005625; GO:0005615; GO:0004802; GO:0007338; GO:0016740; GO:0004008 | 0,77 [0,67 - 0,87] | 0,70 [0,54 - 0,9]  | 0,81 [0,66 - 0,99] |
| BG321905 | 21881 transketolase                                                                 | Tkt                |                                                                                                                                                                                                | 0,77 [0,65 - 0,91] | 0,65 [0,54 - 0,78] | 0,75 [0,65 - 0,88] |
| AA816062 | 16362 interferon regulatory factor 1                                                | Irf1               | GO:0003677; GO:0003700; GO:0006355; GO:0006955; GO:0005634; GO:0045182                                                                                                                         | 0,76 [0,7 - 0,83]  | 0,93 [0,87 - 0,99] | 0,99 [0,94 - 1,05] |
| BI899955 | 18035 nuclear factor of kappa light chain gene enhancer in B-cells inhibitor, alpha | Nfkbia             | GO:0005515; GO:0000060; GO:0005829; GO:0005737; GO:0005634; GO:0042127                                                                                                                         | 0,76 [0,71 - 0,82] | 1,35 [1,26 - 1,46] | 0,96 [0,87 - 1,05] |
| BI793672 | 19708 requiem                                                                       | Req                | GO:0003677; GO:0006355; GO:0006915; GO:0005634                                                                                                                                                 | 0,76 [0,64 - 0,91] | 0,67 [0,46 - 0,98] | 0,84 [0,62 - 1,15] |
| W98440   | 12444 cyclin D2                                                                     | Ccnd2              | GO:0007049; GO:0000074; GO:0005634; GO:0016538                                                                                                                                                 | 0,76 [0,68 - 0,85] | 0,77 [0,73 - 0,81] | 0,85 [0,75 - 0,95] |
| BI963259 | 14312 bromodomain containing 2                                                      | Brd2               | GO:0004674; GO:0007283; GO:0005634                                                                                                                                                             | 0,76 [0,64 - 0,9]  | 0,77 [0,58 - 1]    | 0,84 [0,67 - 1,06] |
| BI319630 | 66867 high mobility group 20A                                                       | Hmg20a             | GO:0003677; GO:0006355                                                                                                                                                                         | 0,75 [0,61 - 0,93] | 0,92 [0,7 - 1,22]  | 0,89 [0,68 - 1,15] |
| AI505476 | 110196 farnesyl diphosphate synthetase                                              | Fdps               | GO:0016740                                                                                                                                                                                     | 0,75 [0,67 - 0,84] | 0,66 [0,53 - 0,82] | 0,83 [0,75 - 0,92] |
| AA986494 | 13629 eukaryotic translation elongation factor 2                                    | Eef2               | GO:0005525; GO:0003746; GO:0005524; GO:0006414; GO:0006412                                                                                                                                     | 0,75 [0,67 - 0,83] | 0,68 [0,55 - 0,85] | 0,72 [0,62 - 0,82] |
| BI465646 | 56700 RIKEN cDNA 0610031J06 gene                                                    | 0610031J06R<br>ik  | GO:0016021; GO:0005615                                                                                                                                                                         | 0,75 [0,58 - 0,95] | 0,64 [0,52 - 0,79] | 0,70 [0,52 - 0,93] |
| BG311049 | 56224 transmembrane 4 superfamily member 9                                          | Tm4sf9-<br>pending | GO:0008583; GO:0007155; GO:0008283; GO:0006928; GO:0016021                                                                                                                                     | 0,74 [0,66 - 0,84] | 0,72 [0,51 - 1]    | 0,74 [0,56 - 0,98] |
| BI788746 | 20016 RNA polymerase 1-1                                                            | Rpo1-1             | GO:0003899; GO:0003677; GO:0006350; GO:0005634; GO:0005736; GO:0016740                                                                                                                         | 0,74 [0,63 - 0,87] | 0,86 [0,68 - 1,08] | 0,88 [0,7 - 1,11]  |
| BI900196 | 20226 seryl-aminoacyl-tRNA synthetase 1                                             | Sars1              | GO:0004828; GO:0005524; GO:0006418; GO:0006412; GO:0004812; GO:0006434; GO:0016874                                                                                                             | 0,74 [0,66 - 0,83] | 0,72 [0,58 - 0,9]  | 0,79 [0,68 - 0,93] |
| AI156875 | 54130 ARP1 actin-related protein 1 homolog A (yeast)                                | Actr1a             | GO:0003774; GO:0005200; GO:0016192; GO:0005884; GO:0005875; GO:0005869; GO:0005856; GO:0015629                                                                                                 | 0,74 [0,58 - 0,94] | 0,61 [0,41 - 0,9]  | 0,73 [0,58 - 0,91] |
| AA118297 | 56370 transgelin 3                                                                  | Tagln3             | GO:0007417; GO:0007517                                                                                                                                                                         | 0,73 [0,65 - 0,83] | 0,91 [0,79 - 1,04] | 0,99 [0,86 - 1,14] |
| AI528846 | 20742 spectrin beta 2                                                               | Spnb2              | GO:0003779; GO:0005515; GO:0005200; GO:0007184; GO:0016020; GO:0005856; GO:0005886; GO:0005634; GO:0007182                                                                                     | 0,73 [0,54 - 0,99] | 0,78 [0,54 - 1,15] | 0,81 [0,6 - 1,09]  |
| BI790926 | 14779 glutathione peroxidase 4                                                      | Gpx4               | GO:0004601; GO:0008430; GO:0004602; GO:0006325; GO:0007283; GO:0007275; GO:0005635; GO:0005829; GO:0005739; GO:0005634; GO:0016491                                                             | 0,73 [0,53 - 0,99] | 1,00 [0,66 - 1,51] | 0,84 [0,6 - 1,18]  |
| BG797208 | 18952 septin 4                                                                      | sep-04             | GO:0005525; GO:0005524; GO:0005871                                                                                                                                                             | 0,73 [0,56 - 0,94] | 0,67 [0,44 - 1,01] | 0,77 [0,54 - 1,09] |
| BG797820 | 16430 intergral membrane protein 1                                                  | Itm1               | GO:0004576; GO:0006486; GO:0016020; GO:0016021; GO:0005615                                                                                                                                     | 0,85 [0,68 - 1,08] | 0,67 [0,51 - 0,88] | 0,86 [0,71 - 1,04] |
| AA061359 | 66277 Kruppel-like factor 15                                                        | Klf15              | GO:0003677; GO:0006355; GO:0005634; GO:0045182                                                                                                                                                 | 0,58 [0,31 - 1,07] | 0,54 [0,38 - 0,76] | 0,62 [0,42 - 0,92] |
| AI323295 | 13198 DNA-damage inducible transcript 3                                             | Ddit3              | GO:0003677; GO:0007050; GO:0006355; GO:0005634                                                                                                                                                 | 0,47 [0,46 - 0,49] | 0,83 [0,76 - 0,91] | 0,93 [0,91 - 0,94] |

Table 2S

| Gene Symbol                                       | Gene Name                                                | Alias(es)                                                                                                    | Forward Primer          | Reverse Primer         |
|---------------------------------------------------|----------------------------------------------------------|--------------------------------------------------------------------------------------------------------------|-------------------------|------------------------|
| <b>Capn6</b>                                      | Calpain 6                                                |                                                                                                              | TTCTCCACCTCCATGAATGA    | TTTGCATACGCTTTTTCCAG   |
| <b>DNA segment, Chr 4, Wayne State University</b> | DNA segment, Chr 4, Wayne State University 53, expressed |                                                                                                              | GGTCGACTACGCGATCACT     | ACCTGGTTCTGGATCTTTCC   |
| <b>Dnajb9</b>                                     | DnaJ (Hsp40) homolog, subfamily B, member 9              | Mdg1, mDj7, ERdj4                                                                                            | TGATGCTGAAGCAAATTCA     | TATTGGCATCCGAGAGTGTT   |
| <b>Egr1</b>                                       | Early growth response 1                                  | egr, TIS8, Zenk, Egr-1, NGFIA, Zfp-6, ETR103, Krox-1, Krox24, NGF1-A, NGF1-A, Zif268, Krox-24, A530045N19RIK | CGAATCTGCATGCGTAACTT    | GCAAACCTCCTCCCACAAAT   |
| <b>Idb1</b>                                       | Inhibitor of DNA binding 1                               | Id1, D2Wsu140e                                                                                               | CTACGACATGAACGGCTGCTACT | CTTGCTCACTTTGCGGTTCTG  |
| <b>Idb2</b>                                       | Inhibitor of DNA binding 2                               | Id2                                                                                                          | GGACGACCCGATGAGTCT      | TGCTGGGCACCAGTTCCTT    |
| <b>Ier2</b>                                       | Immediate early response 2                               | ch1, pip92                                                                                                   | CAGCGATTTGAGCGACAGTA    | GGGTCCACAGTTCAGGAGAC   |
| <b>Kir/Gem</b>                                    | Gem: GTP binding protein                                 |                                                                                                              | TGGTGTTGCGACTGCAAATTC   | CAAACAGTTCCTTCACGTTGTG |
| <b>Klf4</b>                                       | Kruppel-like factor 4 (gut)                              | Zie, GKLF, Gklf                                                                                              | TGAACTGACCAGGCACTACC    | GAAAAGGCCCTGTCACTT     |
| <b>Matr3</b>                                      | Matrin 3                                                 |                                                                                                              | GCAAGCCAGTGAGAGTTCAT    | CACGACCAAGTTCCTTGCTTT  |
| <b>RIKEN cDNA 1110008L20</b>                      | RIKEN cDNA 1110008L20 gene                               |                                                                                                              | GGTTCATGCAGTTTTCATCC    | AAGTCTCGGGGTGTCATGTA   |
| <b>Susp1</b>                                      | SUMO-1 specific protease                                 | RIKEN cDNA 2810017C20 gene                                                                                   | GTTCCCTGGTTTGAAAAA      | CCATCTCACTGGCAGAAGAA   |
| <b>Tob1</b>                                       | transducer of ErbB-2.1                                   | Tob, Trob                                                                                                    | GAAGAATAGTGCCGTAGCA     | TTCAGGAGGTGGTTCACATT   |
